# Supplementary material for: Acute Kidney Injury Instigates Malignant Renal Cell Carcinoma via CXCR2 in Mice with Inactivated Trp53 and Pten in Proximal Tubular Kidney Epithelial Cells
Source: Oxford University Press journal article supplement (doi:10.1158/0008-5472.can-20-2930), 2021-02-08
Supplement: 00085472can202930-sup-250183_3_supp_6878956_qnnwqw.xlsx [file 00085472can202930-sup-250183_3_supp_6878956_qnnwqw.xlsx]

## Sheet: Figure 1
		Fig.1C Kidney weight/body weight (%)						Table Analyzed	kidney weight/body weight(%)
		Mouse #	WT	GPPY
		1	1.0945 (L763)	1.776 (L756)				Column B	GPPY
		2	1.1773 (L750)	1.4056 (L881)				vs.	vs.
		3	1.2028 (N89)	1.0834 (N88)				Column A	WT
		4	1.2845 (N91)	1.3523 (N90)
		5	1.1623 (N93)	1.2207 (N92)				Unpaired t test with Welch's correction
		6	0.7041 (N97)	0.8153 (N98)				P value	<0.0001
		7	0.8837 (N121)	1.5159 (N95)				P value summary	****
		8	0.9762 (N195)	1.6568 (N96)				Significantly different (P < 0.05)?	Yes
		9	0.8432 (N199)	1.6407 (N99)				One- or two-tailed P value?	Two-tailed
		10	0.9853 (N155)	1.9389 (N117)				Welch-corrected t, df	t=5.881, df=41.55
		11	0.6144 (N156)	0.8147 (N154)
		12	0.8178 (N194)	1.2633 (N146)				How big is the difference?
		13	1.0951 (G103)	1.4663 (N192)				Mean of column A	0.9352
		14	0.9245 (G104)	1.6404 (Q621)				Mean of column B	1.382
		15	1.0552 (G105)	1.7064 (Q622)				Difference between means (B - A) ± SEM	0.4467 ± 0.07596
		16	0.9042 (G106)	1.2843 (Q624)				95% confidence interval	0.2934 to 0.6001
		17	0.7304 (Q619)	0.8033 (Q627)				R squared (eta squared)	0.4543
		18	1.1602 (Q623)	1.8234 (O303)
		19	0.6249 (S501)	1.5325 (O323)				F test to compare variances
		20	0.9142 (S562)	1.9151 (S550)				F, DFn, Dfd	3.086, 26, 25
		21	0.7563 (FW005)	1.0622 (S549)				P value	0.0062
		22	1.1313 (H177)	1.3895 (S546)				P value summary	**
		23	0.8014 (H185)	1.3248 (S657)				Significantly different (P < 0.05)?	Yes
		24	1.0432 (W141)	1.3839 (S546)
		25	0.7424 (W031)	1.6444 (W016)				Data analyzed
		26	0.6862 (W033)	0.8418 (Y760)				Sample size, column A	26
		27		1.0092 (Y761)				Sample size, column B	27
		Fig.1F Relative percentage of dysplasia region
		Weeks	Mouse #
		8	0 (Y760)
		20	0 (Y761)	0 (N154)
		24	0.3521(Q624)	0 (Q627)	0 (N146)
		28	0.3138 (S549)	0 (S546)
		36	0.2154 (L881)	5.1938 (L756)	1.5536 (L751)
		40	6.1280 (O303)	5.4176 (O323)	3.4021(N157)
		44	8.5364 (N92)	3.8025 (N99)	4.0379 (N95)	6.1280 (N96)
		56	8.7659 (N107)	9.7382 (N90)	6.4176 (N192)
		60	7.6123 (Q622)	9.8216 (Q621)	6.8340 (S657)
		64	9.2415 (W016)	12.3347 (S550)
		72	14.3728 (N117)
		Fig.1H Percent of Sirus Red positive area per visual field (200X)
		WT					GPPY						Table Analyzed	Sirus red
		Mouse #	Image #	Number	Average per mouse		Mouse #	Image #	Number	Average per mouse
		L763	1	18	12		L756	1	21	18.6667			Column B	GPPY
			2	10				2	15				vs.	vs.
			3	8				3	20				Column A	WT
		L750	1	10	14		W016	1	22	18.6667
			2	20				2	16				Unpaired t test with Welch's correction
			3	12				3	18				P value	0.0279
		W031	1	24	17.6667		Q622	1	29	24.6667			P value summary	*
			2	10				2	26				Significantly different (P < 0.05)?	Yes
			3	19				3	19				One- or two-tailed P value?	Two-tailed
		Q619	1	17	12		L881	1	25	38.3333			Welch-corrected t, df	t=3.159, df=4.639
			2	11				2	37
			3	8				3	53				How big is the difference?
		Q623	1	15	13.3333		Q624	1	26	29			Mean of column A	13.8
			2	17				2	33				Mean of column B	25.87
			3	8				3	28				Difference between means (B - A) ± SEM	12.07 ± 3.820
													95% confidence interval	2.013 to 22.12
													R squared (eta squared)	0.6827
													F test to compare variances
													F, DFn, Dfd	12.44, 4, 4
													P value	0.0316
													P value summary	*
													Significantly different (P < 0.05)?	Yes
													Data analyzed
													Sample size, column A	5
													Sample size, column B	5
		Fig.1H Percent of interstitial fibrosis per visual field (200X)
		WT					GPPY						Table Analyzed	MTS
		Mouse #	Image #	Number	Average per mouse		Mouse #	Image #	Number	Average per mouse
		L763	1	9	9		L756	1	28	19			Column B	GPPY
			2	7				2	17				vs.	vs.
			3	11				3	12				Column A	WT
		L750	1	19	15		W016	1	25	23
			2	16				2	31				Unpaired t test
			3	10				3	13				P value	0.0023
		W031	1	12	13		Q622	1	16	25.3333			P value summary	**
			2	15				2	32				Significantly different (P < 0.05)?	Yes
			3	12				3	28				One- or two-tailed P value?	Two-tailed
		Q619	1	20	18.09		L881	1	29	32			t, df	t=4.399, df=8
			2	12				2	27
			3	23				3	40				How big is the difference?
		Q623	1	10	14		Q624	1	27	28			Mean of column A	13.82
			2	21				2	26				Mean of column B	25.47
			3	11				3	31				Difference between means (B - A) ± SEM	11.65 ± 2.649
													95% confidence interval	5.543 to 17.76
													R squared (eta squared)	0.7075
													F test to compare variances
													F, DFn, Dfd	2.229, 4, 4
													P value	0.4567
													P value summary	ns
													Significantly different (P < 0.05)?	No
													Data analyzed
													Sample size, column A	5
													Sample size, column B	5
		Fig.1H Percent collagen I positive area per visual field (200X)
		WT					GPPY						Table Analyzed	collagen 1
		Mouse #	Image #	% area	Average per mouse		Mouse #	Image #	% area	Average per mouse
		L763	1	0.686	0.685667		L756	1	9.027	9.92333			Column B	GPPY
			2	0.995				2	8.838				vs.	vs.
			3	0.376				3	11.905				Column A	WT
		L750	1	1.595	1.836		W016	1	15.172	14.2863
			2	1.756				2	16.736				Unpaired t test with Welch's correction
			3	2.157				3	10.951				P value	0.0012
		W031	1	1.28	1.121		Q622	1	18.392	17.336			P value summary	**
			2	1.355				2	16.854				Significantly different (P < 0.05)?	Yes
			3	0.728				3	16.762				One- or two-tailed P value?	Two-tailed
		Q623	1	1.595	1.297		L881	1	26.074	20.4333			Welch-corrected t, df	t=7.826, df=4.202
			2	1.394				2	24.567
			3	0.902				3	10.659				How big is the difference?
		Q619	1	0.723	2.38233		Q624	1	15.072	18.72			Mean of column A	1.465
			2	2.535				2	19.837				Mean of column B	16.14
			3	3.889				3	21.251				Difference between means (B - A) ± SEM	14.67 ± 1.875
													95% confidence interval	9.564 to 19.78
													R squared (eta squared)	0.9358
													F test to compare variances
													F, DFn, Dfd	39.56, 4, 4
													P value	0.0036
													P value summary	**
													Significantly different (P < 0.05)?	Yes
													Data analyzed
													Sample size, column A	5
													Sample size, column B	5
		Fig.1H Percent of a-SMA positive area per visual field (200X)
		WT					GPPY						Table Analyzed	a-SMA
		Mouse #	Image #	% area	Average per mouse		Mouse #	Image #	% area	Average per mouse
		Q619	1	3.123	4.65567		L756	1	5.719	9.876			Column B	GPPY
			2	7.368				2	14.161				vs.	vs.
			3	3.476				3	9.748				Column A	WT
		L750	1	2.261	2.14433		W016	1	18.826	15.01
			2	0.42				2	10.406				Unpaired t test with Welch's correction
			3	3.752				3	15.798				P value	0.0024
		W031	1	2.017	2.84		Q622	1	13.343	14.0097			P value summary	**
			2	2.914				2	23.271				Significantly different (P < 0.05)?	Yes
			3	3.589				3	5.415				One- or two-tailed P value?	Two-tailed
		Q623	1	0.815	1.34267		L881	1	18.211	22.02			Welch-corrected t, df	t=6.016, df=4.592
			2	1.458				2	31.537
			3	1.755				3	16.312				How big is the difference?
		L763	1	2.21	3.595		Q624	1	14.519	19.11			Mean of column A	2.914
			2	5.821				2	19.624				Mean of column B	16.01
			3	2.754				3	23.187				Difference between means (B - A) ± SEM	13.10 ± 2.177
													95% confidence interval	7.347 to 18.85
													R squared (eta squared)	0.8874
													F test to compare variances
													F, DFn, Dfd	13.44, 4, 4
													P value	0.0274
													P value summary	*
													Significantly different (P < 0.05)?	Yes
													Data analyzed
													Sample size, column A	5
													Sample size, column B	5

## Sheet: Figure 2
		Fig. 2B Relative percentage of dysplasia region in kidney (%)
										Table Analyzed	sgRNA kidney dysplasia in GPPY groups
				WT		GPPY
				Mouse #	% area	Mouse #	% area			Column B	GPPY
		Control sgRNA	sgRNA kidney	1	0 (O390)	1	0.3132 (B921)			vs.	vs.
				2	0 (O391)	2	0 (O366)			Column A	GPPY
				3	0 (O393)	3	0.1281 (O375)
			Contralateral kidney	1	0 (O390)	1	0 (B921)			Unpaired t test with Welch's correction
				2	0 (O391)	2	0.1553(O366)			P value	0.029
				3	0 (O393)	3	0.2918 (O375)			P value summary	*
		VHL sgRNA	sgRNA kidney	1	0 (O373)	1	4.0132 (O371)			Significantly different (P < 0.05)?	Yes
				2	0 (B944)	2	6.1281 (O372)			One- or two-tailed P value?	One-tailed
				3	0 (B945)	3	2.5365 (B960)			Welch-corrected t, df	t=3.899, df=2.030
			Contralateral kidney	1	0 (O373)	1	0.2553 (O371)
				2	0 (B944)	2	0.1764 (O372)			How big is the difference?
				3	0 (B945)	3	0.0797 (B960)			Mean of column A	0.1471
										Mean of column B	4.226
										Difference between means (B - A) ± SEM	4.079 ± 1.046
										95% confidence interval	-0.3585 to 8.516
										R squared (eta squared)	0.8822
										F test to compare variances
										F, DFn, Dfd	131.4, 2, 2
										P value	0.015
										P value summary	*
										Significantly different (P < 0.05)?	Yes
										Data analyzed
										Sample size, column A	3
										Sample size, column B	3
										Tukey's multiple comparisons test	Mean Diff.	95.00% CI of diff.	Significant?	Summary	Adjusted P Value
		Fig.2C Kidney weight /body weight (%)								WT vs. GPPY	-0.03997	-0.3294 to 0.2494	No	ns	0.969	A-B
		Control sgRNA		VHL sgRNA						WT vs. WT	0.09863	-0.1908 to 0.3880	No	ns	0.704	A-C
		WT	GPPY	WT	GPPY					WT vs. GPPY	0.06883	-0.2206 to 0.3582	No	ns	0.869	A-D
		0.7041 (O390)	0.8424 (B921)	0.8322 (O373)	0.7323 (O371)					GPPY vs. WT	0.1386	-0.1508 to 0.4280	No	ns	0.463	B-C
		0.8837 (O391)	1.0636 (O366)	0.7194 (B944)	0.7836 (O372)					GPPY vs. GPPY	0.1088	-0.1806 to 0.3982	No	ns	0.641	B-D
		0.9762 (O393)	0.7778 (O375)	0.7276 (B945)	0.8424 (B960)					WT vs. GPPY	-0.0298	-0.3192 to 0.2596	No	ns	0.987	C-D
																										Tukey's multiple comparisons test	Mean Diff.	95.00% CI of diff.	Significant?	Summary	Adjusted P Value
																										WT vs. GPPY	0.4718	-17.38 to 18.33	No	ns	>.999	A-B
		Fig. 2E Relative percentage of VHL postive region in kidney (%)																								WT vs. WT	-1.293	-19.15 to 16.56	No	ns	>.999	A-C
		sgRNA injection kidney											contralateral kidney													WT vs. GPPY	0.9872	-16.87 to 18.84	No	ns	>.999	A-D
		WT, control sgRNA					GPPY,control sgRNA						WT, control sgRNA					GPPY,control sgRNA								WT vs. WT	32.52	14.66 to 50.37	Yes	***	<.001	A-E
		Mouse #	Image #	% area	Average per mouse		Mouse #	Image #	% area	Average per mouse			Mouse #	Image #	% area	Average per mouse		Mouse #	Image #	% area	Average per mouse					WT vs. GPPY	32.45	14.60 to 50.31	Yes	***	<.001	A-F
		O390	1	68.337	75.7297		B921	1	46.732	64.5413			O390	1	84.276	70.1803		B921	1	57.423	61.38					WT vs. WT	-1.659	-19.52 to 16.20	No	ns	>.999	A-G
			2	80.534				2	62.233					2	68.914				2	55.145						WT vs. GPPY	1.291	-16.57 to 19.15	No	ns	>.999	A-H
			3	78.318				3	84.659					3	57.351				3	71.572						GPPY vs. WT	-1.765	-19.62 to 16.09	No	ns	>.999	B-C
		O391	1	75.431	65.6243		O366	1	72.136	79.6083			O391	1	81.273	71.2643		O366	1	80.726	70.6697					GPPY vs. GPPY	0.5155	-17.34 to 18.37	No	ns	>.999	B-D
			2	63.322				2	86.585					2	69.538				2	68.869						GPPY vs. WT	32.05	14.19 to 49.90	Yes	***	<.001	B-E
			3	58.12				3	80.104					3	62.982				3	62.414						GPPY vs. GPPY	31.98	14.12 to 49.84	Yes	***	<.001	B-F
		O393	1	70.891	63.462		O375	1	52.867	59.23			O393	1	54.486	67.2483		O375	1	69.752	69.797					GPPY vs. WT	-2.131	-19.99 to 15.72	No	ns	>.999	B-G
			2	60.182				2	56.918					2	79.797				2	73.378						GPPY vs. GPPY	0.8188	-17.04 to 18.67	No	ns	>.999	B-H
			3	59.313				3	67.905					3	67.462				3	66.261						WT vs. GPPY	2.28	-15.58 to 20.14	No	ns	>.999	C-D
																										WT vs. WT	33.81	15.95 to 51.67	Yes	***	<.001	C-E
		sgRNA injection kidney											contralateral kidney													WT vs. GPPY	33.75	15.89 to 51.60	Yes	***	<.001	C-F
		WT, VHLsgRNA					GPPY,VHL sgRNA						WT, VHLsgRNA					GPPY,VHL sgRNA								WT vs. WT	-0.3667	-18.22 to 17.49	No	ns	>.999	C-G
		Mouse #	Image #	% area	Average per mouse		Mouse #	Image #	% area	Average per mouse			Mouse #	Image #	% area	Average per mouse		Mouse #	Image #	% area	Average per mouse					WT vs. GPPY	2.583	-15.27 to 20.44	No	ns	>.999	C-H
		O373	1	37.824	37.149		O371	1	35.162	37.016			O373	1	66.531	66.1707		O371	1	75.302	73.2773					GPPY vs. WT	31.53	13.67 to 49.39	Yes	***	<.001	D-E
			2	48.641				2	39.795					2	59.528				2	66.448						GPPY vs. GPPY	31.47	13.61 to 49.32	Yes	***	<.001	D-F
			3	24.982				3	36.091					3	72.453				3	78.082						GPPY vs. WT	-2.647	-20.50 to 15.21	No	ns	>.999	D-G
		B944	1	38.207	30.9557		O372	1	28.133	27.1827			B944	1	78.872	73.8033		O372	1	67.782	66.1997					GPPY vs. GPPY	0.3033	-17.55 to 18.16	No	ns	>.999	D-H
			2	32.545				2	23.241					2	62.667				2	70.275						WT vs. GPPY	-0.06527	-17.92 to 17.79	No	ns	>.999	E-F
			3	22.115				3	30.174					3	79.871				3	60.542						WT vs. WT	-34.18	-52.03 to -16.32	Yes	***	<.001	E-G
		B945	1	29.166	39.1547		B960	1	45.634	43.2583			B945	1	75.349	69.8197		B960	1	64.848	61.459					WT vs. GPPY	-31.23	-49.08 to -13.37	Yes	***	<.001	E-H
			2	37.375				2	51.522					2	68.612				2	58.955						GPPY vs. WT	-34.11	-51.97 to -16.26	Yes	***	<.001	F-G
			3	50.923				3	32.619					3	65.498				3	60.574						GPPY vs. GPPY	-31.16	-49.02 to -13.31	Yes	***	<.001	F-H
																										WT vs. GPPY	2.95	-14.91 to 20.81	No	ns	0.999	G-H

## Sheet: Figure 3
								Table Analyzed	kidney weight to body weight WT vs GPPY IRI				Table Analyzed	kidney weight to body weight WT vs GPPY Contralateral				Table Analyzed	kidney weight to body weight GPPY IRI vs GPPY Contralateral
		Fig.3B Kidney weight /body weight (%)
			Injuried kidney		Contralateral kidney			Column B	GPPY				Column B	GPPY				Column B	GPPY
		Mouse #	WT	GPPY	WT	GPPY		vs.	vs.				vs.	vs.				vs.	vs.
		1	0.7041 (K16)	1.3483 (W72)	0.9205 (K16)	1.4668 (W72)		Column A	WT				Column A	WT				Column A	GPPY
		2	0.8837 (O301)	2.2594 (K18)	1.1139 (O301)	6.3801 (K18)
		3	0.9762 (S660)	2.0195 (W021)	1.0513 (S660)	5.7064 (W021)		Unpaired t test with Welch's correction					Unpaired t test with Welch's correction					Unpaired t test with Welch's correction
		4	0.8424 (G256)	1.5791 (W022)	0.7862 (G256)	3.1702 (W022)		P value	<.001				P value	0.007				P value	0.045
		5	1.0636 (O306)	1.7447 (W026)	0.7301 (O306)	2.0633 (W026)		P value summary	***				P value summary	**				P value summary	*
		6	0.7778 (O304)	2.5915 (O305)	0.7602 (O304)	4.3839 (O305)		Significantly different (P < 0.05)?	Yes				Significantly different (P < 0.05)?	Yes				Significantly different (P < 0.05)?	Yes
		7	1.2152 (O328)	1.2525 (G275)	1.3249 (O328)	1.8444 (G275)		One- or two-tailed P value?	Two-tailed				One- or two-tailed P value?	Two-tailed				One- or two-tailed P value?	Two-tailed
		8	0.84 (B992)	2.1092 (G226)	1.2681 (B992)	2.6405 (G226)		Welch-corrected t, df	t=5.458, df=8.746				Welch-corrected t, df	t=3.754, df=7.221				Welch-corrected t, df	t=2.375, df=7.885
								How big is the difference?					How big is the difference?					How big is the difference?
								Mean of column A	0.9132				Mean of column A	0.9944				Mean of column A	1.863
								Mean of column B	1.863				Mean of column B	3.457				Mean of column B	3.457
								Difference between means (B - A) ± SEM	0.9499 ± 0.1740				Difference between means (B - A) ± SEM	2.462 ± 0.6559				Difference between means (B - A) ± SEM	1.594 ± 0.6711
								95% confidence interval	0.5544 to 1.345				95% confidence interval	0.9210 to 4.004				95% confidence interval	0.04229 to 3.145
								R squared (eta squared)	0.773				R squared (eta squared)	0.6612				R squared (eta squared)	0.417
								F test to compare variances					F test to compare variances					F test to compare variances
								F, DFn, Dfd	7.889, 7, 7				F, DFn, Dfd	63.23, 7, 7				F, DFn, Dfd	15.76, 7, 7
								P value	0.014				P value	<.001				P value	0.002
								P value summary	*				P value summary	***				P value summary	**
								Significantly different (P < 0.05)?	Yes				Significantly different (P < 0.05)?	Yes				Significantly different (P < 0.05)?	Yes
								Data analyzed					Data analyzed					Data analyzed
								Sample size, column A	8				Sample size, column A	8				Sample size, column A	8
								Sample size, column B	8				Sample size, column B	8				Sample size, column B	8
		Fig.3D Relative percentage of dysplasia region in kidney						Number of families	1
			Injuried kidney		Contralateral kidney			Number of comparisons per family	6
		Mouse #	WT	GPPY	WT	GPPY		Alpha	0.05
		1	0 (K16)	3.3621 (W72)	0 (K16)	7.7834 (W72)
		2	0 (O301)	16.6717 (K18)	0 (O301)	25.4627 (K18)		Dunn's multiple comparisons test	Mean rank diff.	Significant?	Summary	Adjusted P Value
		3	0 (S660)	11.0373 (W021)	0 (S660)	23.9796 (W021)		WT vs. GPPY	-13.63	Yes	*	0.011	A-B
		4	0 (G256)	5.8382 (W022)	0 (G256)	13.5912 (W022)		WT vs. WT	0	No	ns	>.999	A-C
		5	0 (O306)	10.5475 (W026)	0 (O306)	17.4794 (W026)		WT vs. GPPY	-18.38	Yes	***	<.001	A-D
		6	0 (O304)	9.8209 (O305)	0 (O304)	22.8873 (O305)		GPPY vs. WT	13.63	Yes	*	0.011	B-C
		7	0 (O328)	7.9068 (G275)	0 (O328)	6.1065 (G275)		GPPY vs. GPPY	-4.75	No	ns	>.999	B-D
		8	0 (B992)	6.8936 (G226)	0 (B992)	15.6035 (G226)		WT vs. GPPY	-18.38	Yes	***	<.001	C-D
		Fig.3E Relative percentage of tumor region in kidney						Number of families	1
			Injuried kidney		Contralateral kidney			Number of comparisons per family	6
		Mouse #	WT	GPPY	WT	GPPY		Alpha	0.05
		1	0 (K16)	0 (W72)	0 (K16)	8.9326 (W72)
		2	0 (O301)	10.9302 (K18)	0 (O301)	31.4987 (K18)		Dunn's multiple comparisons test	Mean rank diff.	Significant?	Summary	Adjusted P Value
		3	0 (S660)	8.6742 (W021)	0 (S660)	16.1733 (W021)		WT vs. GPPY	-6.375	No	ns	0.708	A-B
		4	0 (G256)	8.0934 (W022)	0 (G256)	30.5725 (W022)		WT vs. WT	0	No	ns	>.999	A-C
		5	0 (O306)	6.6308 (W026)	0 (O306)	24.4281 (W026)		WT vs. GPPY	-17.63	Yes	***	<.001	A-D
		6	0 (O304)	0 (O305)	0 (O304)	16.8648 (O305)		GPPY vs. WT	6.375	No	ns	0.708	B-C
		7	0 (O328)	0 (G275)	0 (O328)	7.9231 (G275)		GPPY vs. GPPY	-11.25	Yes	*	0.035	B-D
		8	0 (B992)	0 (G226)	0 (B992)	12.7329 (G226)		WT vs. GPPY	-17.63	Yes	***	<.001	C-D
		Fig. 3G Percent Sirus Red positive area/visual field (200X)
		Injuried kidney										Contralateral kidney
		WT,Injuried kidney					GPPY,Injuried kidney					WT,Contralateral kidney					GPPY,Contralateral kidney
		Mouse #	Image #	Number	Average per mouse		Mouse #	Image #	Number	Average per mouse		Mouse #	Image #	Number	Average per mouse		Mouse #	Image #	Number	Average per mouse			Number of families	1
		K16	1	16	19		W72	1	31	28		K16	1	15	15.3333		W72	1	42	39.3333			Number of comparisons per family	6
			2	12				2	29				2	19				2	46				Alpha	0.05
			3	29				3	24				3	12				3	30
		O304	1	7	11		K18	1	26	32.3333		O304	1	27	19		K18	1	48	49.3333			Tukey's multiple comparisons test	Mean Diff.	95.00% CI of diff.	Significant?	Summary	Adjusted P Value
			2	9				2	31				2	14				2	54				WT vs. GPPY	-17.67	-23.48 to -11.86	Yes	***	<.001	A-B
			3	17				3	40				3	16				3	46				WT vs. WT	-4.466	-10.27 to 1.343	No	ns	0.166	A-C
		S660	1	8	15		W021	1	37	35.3333		S660	1	17	21.3333		W021	1	39	46.3333			WT vs. GPPY	-30.87	-36.67 to -25.06	Yes	***	<.001	A-D
			2	19				2	28				2	22				2	57				GPPY vs. WT	13.2	7.391 to 19.01	Yes	***	<.001	B-C
			3	18				3	41				3	25				3	43				GPPY vs. GPPY	-13.2	-19.01 to -7.390	Yes	***	<.001	B-D
		B992	1	21	13		W022	1	29	34.3333		B992	1	16	16.3333		W022	1	62	45			WT vs. GPPY	-26.4	-32.21 to -20.59	Yes	***	<.001	C-D
			2	12				2	36				2	22				2	48
			3	6				3	38				3	11				3	25
		O328	1	13	12		W026	1	22	28.3333		O328	1	31	20.3333		W026	1	39	44.3333
			2	9				2	27				2	22				2	45
			3	14				3	36				3	8				3	49
		Fig. 3I Percent of interstitial fibrosis/visual field (200X)
		Injuried kidney										Contralateral kidney
		WT,Injuried kidney					GPPY,Injuried kidney					WT,Contralateral kidney					GPPY,Contralateral kidney						Number of families	1
		Mouse #	Image #	Number	Average per mouse		Mouse #	Image #	Number	Average per mouse		Mouse #	Image #	Number	Average per mouse		Mouse #	Image #	Number	Average per mouse			Number of comparisons per family	6
		K16	1	8	13		W72	1	35	35		K16	1	17	15		W72	1	40	42.6667			Alpha	0.05
			2	11				2	24				2	16				2	48
			3	20				3	46				3	12				3	40				Tukey's multiple comparisons test	Mean Diff.	95.00% CI of diff.	Significant?	Summary	Adjusted P Value
		O304	1	22	19		K18	1	42	43		O304	1	22	19.6667		K18	1	43	57.6667			WT vs. GPPY	-20.2	-27.12 to -13.28	Yes	***	<.001	A-B
			2	14				2	57				2	19				2	62				WT vs. WT	-1.867	-8.786 to 5.053	No	ns	0.866	A-C
			3	21				3	30				3	18				3	68				WT vs. GPPY	-34.07	-40.99 to -27.15	Yes	***	<.001	A-D
		S660	1	14	18.6667		W021	1	28	37		S660	1	30	21		W021	1	37	54.3333			GPPY vs. WT	18.33	11.41 to 25.25	Yes	***	<.001	B-C
			2	23				2	39				2	17				2	58				GPPY vs. GPPY	-13.87	-20.79 to -6.947	Yes	***	<.001	B-D
			3	19				3	44				3	16				3	68				WT vs. GPPY	-32.2	-39.12 to -25.28	Yes	***	<.001	C-D
		B992	1	21	16		W022	1	37	31.3333		B992	1	23	17.3333		W022	1	38	48.3333
			2	17				2	18				2	18				2	52
			3	10				3	39				3	11				3	55
		O328	1	18	17		W026	1	27	38.3333		O328	1	28	20		W026	1	45	49.6667
			2	23				2	33				2	21				2	38
			3	10				3	55				3	11				3	66
		Fig. 3K Percent collagen I positive area per visual field (200X)
		Injuried kidney										Contralateral kidney
		WT,Injuried kidney					GPPY,Injuried kidney					WT,Contralateral kidney					GPPY,Contralateral kidney						Number of families	1
		Mouse #	Image #	% area	Average per mouse		Mouse #	Image #	% area	Average per mouse		Mouse #	Image #	% area	Average per mouse		Mouse #	Image #	% area	Average per mouse			Number of comparisons per family	6
		K16	1	2.717	1.595		W72	1	35.71	25.8697		K16	1	0.916	1.83567		W72	1	11.426	28.3917			Alpha	0.05
			2	1.295				2	19.136				2	1.048				2	29.217
			3	0.773				3	22.763				3	3.543				3	44.532				Tukey's multiple comparisons test	Mean Diff.	95.00% CI of diff.	Significant?	Summary	Adjusted P Value
		O304	1	1.043	3.14367		K18	1	18.384	31.223		O304	1	2.423	2.51533		K18	1	55.722	40.8333			WT vs. GPPY	-22.61	-29.32 to -15.91	Yes	***	<.001	A-B
			2	4.589				2	39.208				2	0.341				2	26.597				WT vs. WT	-0.5782	-7.284 to 6.127	No	ns	0.995	A-C
			3	3.799				3	36.077				3	4.782				3	40.181				WT vs. GPPY	-30.94	-37.64 to -24.23	Yes	***	<.001	A-D
		S660	1	2.52	2.71567		W021	1	25.33	21.057		S660	1	1.842	3.99233		W021	1	29.736	37.4297			GPPY vs. WT	22.03	15.33 to 28.74	Yes	***	<.001	B-C
			2	4.015				2	16.265				2	3.671				2	45.874				GPPY vs. GPPY	-8.326	-15.03 to -1.620	Yes	*	0.013	B-D
			3	1.612				3	21.576				3	6.464				3	36.679				WT vs. GPPY	-30.36	-37.07 to -23.65	Yes	***	<.001	C-D
		B992	1	3.658	2.11933		W022	1	29.039	23.463		B992	1	5.122	4.59333		W022	1	26.338	35.9497
			2	2.113				2	16.182				2	1.435				2	39.527
			3	0.587				3	25.168				3	7.223				3	41.984
		O328	1	4.526	4.72567		W026	1	34.095	25.76		O328	1	4.095	4.263		W026	1	32.568	26.3897
			2	0.372				2	14.358				2	3.47				2	16.286
			3	9.279				3	28.827				3	5.224				3	30.315
		Fig. 3M Percent a-SMA postive area/visual field (200X)
		Injuried kidney										Contralateral kidney
		WT,Injuried kidney					GPPY,Injuried kidney					WT,Contralateral kidney					GPPY,Contralateral kidney
		Mouse #	Image #	% area	Average per mouse		Mouse #	Image #	% area	Average per mouse		Mouse #	Image #	% area	Average per mouse		Mouse #	Image #	% area	Average per mouse
		K16	1	6.802	5.34267		W72	1	14.932	15.871		K16	1	1.987	3.51333		W72	1	23.373	24.3913			Number of families	1
			2	4.135				2	20.123				2	2.472				2	28.239				Number of comparisons per family	6
			3	5.091				3	12.558				3	6.081				3	21.562				Alpha	0.05
		O304	1	2.632	3.14433		K18	1	27.083	23.459		O304	1	2.723	2.751		K18	1	39.321	35.422
			2	0.942				2	19.817				2	1.433				2	24.858				Tukey's multiple comparisons test	Mean Diff.	95.00% CI of diff.	Significant?	Summary	Adjusted P Value
			3	5.859				3	23.477				3	4.097				3	42.087				WT vs. GPPY	-12.76	-19.81 to -5.714	Yes	***	<.001	A-B
		S660	1	3.321	4.83433		W021	1	20.723	17.2233		S660	1	1.932	5.99933		W021	1	32.305	34.9167			WT vs. WT	0.1117	-6.934 to 7.158	No	ns	>.999	A-C
			2	3.794				2	12.683				2	6.324				2	28.923				WT vs. GPPY	-24.68	-31.72 to -17.63	Yes	***	<.001	A-D
			3	7.388				3	18.264				3	9.742				3	43.522				GPPY vs. WT	12.87	5.825 to 19.92	Yes	***	<.001	B-C
		B992	1	8.662	6.65467		W022	1	12.573	11.0563		B992	1	3.097	2.83433		W022	1	32.198	28.3893			GPPY vs. GPPY	-11.92	-18.96 to -4.870	Yes	***	<.001	B-D
			2	6.563				2	9.327				2	2.244				2	27.329				WT vs. GPPY	-24.79	-31.83 to -17.74	Yes	***	<.001	C-D
			3	4.739				3	11.269				3	3.162				3	25.641
		O328	1	0.378	2.595		W026	1	14.661	18.76		O328	1	6.529	6.915		W026	1	28.342	22.8303
			2	2.884				2	30.181				2	2.974				2	14.865
			3	4.523				3	11.438				3	11.242				3	25.284
		Fig. 3O Percent FSP-1 postive area/visual field (200X)
		Injuried kidney										Contralateral kidney
		WT,Injuried kidney					GPPY,Injuried kidney					WT,Contralateral kidney					GPPY,Contralateral kidney
		Mouse #	Image #	% area	Average per mouse		Mouse #	Image #	% area	Average per mouse		Mouse #	Image #	% area	Average per mouse		Mouse #	Image #	% area	Average per mouse
		K16	1	12.607	11.242		W72	1	14.164	18.2113		K16	1	11.324	17.14		W72	1	28.133	29.3117			Number of families	1
			2	10.172				2	20.823				2	16.42				2	34.516				Number of comparisons per family	6
			3	10.947				3	19.647				3	23.676				3	25.286				Alpha	0.05
		O304	1	18.229	12.11		K18	1	32.123	24.3203		O304	1	8.751	6.14967		K18	1	44.892	39.031
			2	9.928				2	28.372				2	6.968				2	32.569				Tukey's multiple comparisons test	Mean Diff.	95.00% CI of diff.	Significant?	Summary	Adjusted P Value
			3	8.173				3	12.466				3	2.73				3	39.632				WT vs. GPPY	-11.97	-19.79 to -4.146	Yes	**	0.002	A-B
		S660	1	13.135	14.0767		W021	1	35.321	28.263		S660	1	12.35	9.01667		W021	1	38.815	37.3177			WT vs. WT	-1.511	-9.331 to 6.309	No	ns	0.944	A-C
			2	9.01				2	22.418				2	8.114				2	29.407				WT vs. GPPY	-21.98	-29.80 to -14.16	Yes	***	<.001	A-D
			3	20.085				3	27.05				3	6.586				3	43.731				GPPY vs. WT	10.45	2.635 to 18.27	Yes	**	0.007	B-C
		B992	1	9.601	9.161		W022	1	24.521	22.7267		B992	1	12.437	14.016		W022	1	29.903	25.261			GPPY vs. GPPY	-10.01	-17.83 to -2.190	Yes	*	0.01	B-D
			2	4.256				2	17.492				2	9.193				2	19.606				WT vs. GPPY	-20.46	-28.28 to -12.64	Yes	***	<.001	C-D
			3	13.626				3	26.167				3	20.418				3	26.274
		O328	1	6.891	7.22167		W026	1	28.132	20.12		O328	1	22.971	15.0133		W026	1	29.763	32.771
			2	10.95				2	19.879				2	9.243				2	31.617
			3	3.824				3	12.349				3	12.826				3	36.933
		Fig.3Q Percent CD31 postive area/visual field (200X)
		Injuried kidney										Contralateral kidney
		WT,Injuried kidney					GPPY,Injuried kidney					WT,Contralateral kidney					GPPY,Contralateral kidney
		Mouse #	Image #	% area	Average per mouse		Mouse #	Image #	% area	Average per mouse		Mouse #	Image #	% area	Average per mouse		Mouse #	Image #	% area	Average per mouse
		K16	1	2.312	2.75233		W72	1	8.414	5.84233		K16	1	3.345	5.45533		W72	1	11.857	15.4697
			2	0.382				2	4.951				2	4.423				2	21.053				Number of families	1
			3	5.563				3	4.162				3	8.598				3	13.499				Number of comparisons per family	6
		O304	1	0.607	4.612		K18	1	16.632	17.441		O304	1	2.837	3.384		K18	1	30.528	24.191			Alpha	0.05
			2	5.142				2	13.433				2	1.453				2	24.311
			3	8.087				3	22.258				3	5.862				3	17.734				Tukey's multiple comparisons test	Mean Diff.	95.00% CI of diff.	Significant?	Summary	Adjusted P Value
		S660	1	2.143	2.21133		W021	1	12.562	10.6117		S660	1	4.624	2.16533		W021	1	22.023	16.2817			WT vs. GPPY	-8.782	-14.37 to -3.198	Yes	**	0.002	A-B
			2	0.922				2	10.436				2	0.342				2	19.635				WT vs. WT	-0.336	-5.920 to 5.248	No	ns	0.998	A-C
			3	3.569				3	8.837				3	1.53				3	7.187				WT vs. GPPY	-14.98	-20.56 to -9.396	Yes	***	<.001	A-D
		B992	1	1.801	3.12167		W022	1	14.114	14.263		B992	1	1.509	1.525		W022	1	8.392	14.9097			GPPY vs. WT	8.446	2.862 to 14.03	Yes	**	0.003	B-C
			2	3.372				2	18.907				2	2.243				2	10.513				GPPY vs. GPPY	-6.198	-11.78 to -0.6137	Yes	*	0.027	B-D
			3	4.192				3	9.768				3	0.823				3	25.824				WT vs. GPPY	-14.64	-20.23 to -9.060	Yes	***	<.001	C-D
		O328	1	1.591	1.061		W026	1	12.132	9.513		O328	1	0.315	2.74233		W026	1	19.026	17.8067
			2	0.133				2	6.895				2	5.078				2	22.101
			3	1.459				3	9.512				3	2.834				3	12.293

## Sheet: Figure 4
			Fig.4B All cytokine quantifications
				WT		GPPY
				K16	S660	W72	K18
			CXCL13	0.408519	0.59993	0.186573	0.315536
			TIMP1	0.387966	0.779568	0.14122	0.185293
			CXCL1	0.736403	0.89891	0.217403	0.0639287
			IL-1𝛾α	0.391053	0.754071	0.207503	0.0979021
			C5/C5α	1.17642	0.902171	1.04053	1.21419
			CD54	1.90466	1.92195	1.75834	1.98111
			IFN-𝜸α	0.310807	0.158933	0.208735	0.185293
			IL-1α	0.361948	0.672267	0.463123	0.731151
			CXCL12	1.25513	0.985517	0.816217	0.844341
			M-CSF	0.941466	0.830385	0.820103	0.796748
			CCL2	0.167349	0.699362	0.142593	0.0878021
			CCL12	0.198791	0.641537	0.132249	0.155095
			Fig.4C CXCL1 cytokine levels
				without IRI		with IRI					Games-Howell's multiple comparisons test	Mean Diff.	95.00% CI of diff.	Significant?	Summary	Adjusted P Value
			mouse #	WT	GPPY	WT	GPPY				WT vs. GPPY	-4.403	-30.34 to 21.53	No	ns	0.925
			1	20.19 (W031)	22.28 (W016)	45.57 (O328)	649.38 (W021)				WT vs. WT	-64.32	-177.7 to 49.11	No	ns	0.204
			2	21.32 (N199)	38.21 (N192)	68.65 (B992)	568.64 (W022)				WT vs. GPPY	-456.2	-844.0 to -68.45	Yes	*	0.032
			3	38.29 (Q619)	19.49 (Q622)	91.76 (O306)	429.87 (W026)				GPPY vs. WT	-59.92	-171.0 to 51.20	No	ns	0.237
			4	26.18 (Q623)	43.61 (Q624)	157.28 (O304)	282.98 (G226)				GPPY vs. GPPY	-451.8	-838.7 to -64.97	Yes	*	0.033
											WT vs. GPPY	-391.9	-757.7 to -26.08	Yes	*	0.041
			Fig.4F Percent CXCL1 postive area/visual field (200X)
			WT					GPPY					WT					GPPY
			Injuried kidney										Contralateral kidney
			Mouse #	Image #	% area	Average per mouse		Mouse #	Image #	% area	Average per mouse		Mouse #	Image #	% area	Average per mouse		Mouse #	Image #	% area	Average per mouse
			K16	1	2.309	2.059		W72	1	34.086	31.1617		K16	1	3.132	2.783		W72	1	4.115	7.39833
				2	1.123				2	30.827				2	0.725				2	8.133
				3	2.745				3	28.572				3	4.492				3	9.947
			O304	1	2.037	1.694		K18	1	44.868	41.4273		O304	1	4.765	3.229		K18	1	38.134	35.143
				2	2.182				2	40.236				2	3.724				2	33.531				Dunnett's T3 multiple comparisons test	Mean Diff.	95.00% CI of diff.	Significant?	Summary	Adjusted P Value	D-?
				3	0.863				3	39.178				3	1.198				3	33.764				GPPY vs. WT	456.2	113.6 to 798.8	Yes	*	0.023	A
			S660	1	3.433	2.50067		W021	1	22.963	22.192		S660	1	1.314	0.975		W021	1	16.783	14.759			GPPY vs. GPPY	451.8	110.0 to 793.6	Yes	*	0.023	B
				2	2.912				2	13.814				2	0.932				2	17.673				GPPY vs. WT	391.9	67.62 to 716.2	Yes	*	0.028	C
				3	1.157				3	29.799				3	0.679				3	9.821
			B992	1	4.201	3.258		W022	1	45.803	44.435		B992	1	1.818	2.85133		W022	1	22.893	12.839
				2	3.346				2	37.973				2	2.787				2	10.968
				3	2.227				3	49.529				3	3.949				3	4.656
			O328	1	2.802	2.758		W026	1	22.166	24.865		O328	1	2.212	3.01367		W026	1	20.178	25.457
				2	1.217				2	30.804				2	3.241				2	25.662
				3	4.255				3	21.625				3	3.588				3	30.531
								O305	1	16.513	20.0627							O305	1	8.651	8.87
									2	13.97									2	10.387
									3	29.705									3	7.572
								G275	1	10.315	15.3643							G275	1	5.546	8.03667
									2	13.107									2	11.729
									3	22.671									3	6.835
								G226	1	25.032	24.373							G226	1	11.643	12.928
									2	14.213									2	10.652
									3	33.874									3	16.489
			Fig.4G Percent CXCR2 postive area/visual field (200X)
			WT					GPPY					WT					GPPY
			Injuried kidney										Contralateral kidney
			Mouse #	Image #	% area	Average per mouse		Mouse #	Image #	% area	Average per mouse		Mouse #	Image #	% area	Average per mouse		Mouse #	Image #	% area	Average per mouse
			K16	1	1.821	3.34267		W72	1	5.961	9.76667		K16	1	1.342	2.83433		W72	1	10.413	7.392			Number of families	1
				2	4.415				2	10.503				2	2.125				2	7.535				Number of comparisons per family	6
				3	3.792				3	12.836				3	5.036				3	4.228				Alpha	0.05
			O304	1	0.13	0.143667		K18	1	8.513	11.055		O304	1	0.208	2.51533		K18	1	26.713	28.43
				2	0.212				2	10.037				2	2.823				2	22.973				Tukey's multiple comparisons test	Mean Diff.	95.00% CI of diff.	Significant?	Summary	Adjusted P Value
				3	0.089				3	14.615				3	4.515				3	35.604				WT vs. GPPY	-8.328	-15.87 to -0.7861	Yes	*	0.028	A-B
			S660	1	0	0		W021	1	6.431	13.466		S660	1	0.104	0.999		W021	1	16.119	20.3937			WT vs. WT	-0.6553	-8.198 to 6.887	No	ns	0.994	A-C
				2	0				2	15.172				2	1.354				2	24.735				WT vs. GPPY	-18.05	-25.60 to -10.51	Yes	***	<.001	A-D
				3	0				3	18.795				3	1.539				3	20.327				GPPY vs. WT	7.673	0.1309 to 15.22	Yes	*	0.045	B-C
			B992	1	3.182	2.65567		W022	1	3.124	5.874		B992	1	1.016	1.751		W022	1	14.303	21.9527			GPPY vs. GPPY	-9.726	-17.27 to -2.184	Yes	**	0.01	B-D
				2	1.967				2	10.332				2	3.449				2	36.137				WT vs. GPPY	-17.4	-24.94 to -9.857	Yes	***	<.001	C-D
				3	2.818				3	4.166				3	0.788				3	15.418
			O328	1	0.391	0.595		W026	1	13.623	8.22		O328	1	2.665	1.91467		W026	1	24.632	18.837
				2	0.923				2	4.702				2	2.103				2	20.512
				3	0.471				3	6.335				3	0.976				3	11.367
			Fig.4H Relative Cxcl1 mRNA levels																	Statistical comparisons were performed based on Delta Delta Ct values in each group
				n=1		n=2		n=3				n=1		n=2		n=3				Table Analyzed	CXCL1 qPCR delta delta CT value
				IRI cancer cells	Contralateral cancer cells	IRI cancer cells	Contralateral cancer cells	IRI cancer cells	Contralateral cancer cells			IRI cancer cells	Contralateral cancer cells	IRI cancer cells	Contralateral cancer cells	IRI cancer cells	Contralateral cancer cells
											Gapdh	14.152	14.064	13.942	13.765	14.398	14.204			Column B	Dysplastic cells; Contralateral
			Gapdh	14.114	14.257	14.331	13.9	13.984	14.587			14.073	14.454	14.723	14.035	13.573	14.972			vs.	vs.
			Cxcl1	16.931	18.58	16.132	18.196	16.197	18.739		Average of technical replicates	14.1125	14.259	14.3325	13.9	13.9855	14.588			Column A	Dysplastic cells; IRI
			Delta Ct	2.817	4.323	1.801	4.296	2.213	4.152											Unpaired t test with Welch's correction
												n=1		n=2		n=3				P value	0.02
			Average	2.817		1.801		2.213				IRI cancer cells	Contralateral cancer cells	IRI cancer cells	Contralateral cancer cells	IRI cancer cells	Contralateral cancer cells			P value summary	*
			Delta Delta Ct	0	1.506	0	2.495	0	1.939		Cxcl1	17.692	18.643	15.844	18.483	15.828	18.384			Significantly different (P < 0.05)?	Yes
												16.173	18.517	16.421	17.915	16.574	19.096			One- or two-tailed P value?	Two-tailed
			Fold Change	1	0.352086	1	0.17739	1	0.260797		Average of technical replicates	16.9325	18.58	16.1325	18.199	16.201	18.74			Welch-corrected t, df	t=7.044, df=2.000
																				How big is the difference?
																				Mean of column A	0
																				Mean of column B	1.977
																				Difference between means (B - A) ± SEM	1.977 ± 0.2806
																				95% confidence interval	0.7693 to 3.184
																				R squared (eta squared)	0.9613
																				F test to compare variances
																				F, DFn, Dfd	Infinity, 2, 2
																				P value	<.001
																				P value summary	***
																				Significantly different (P < 0.05)?	Yes
																				Data analyzed
																				Sample size, column A	3
																				Sample size, column B	3
			Fig.4I Relative Cxcr2 mRNA levels																	Statistical comparisons were performed based on Delta Delta Ct values in each group
				n=1		n=2		n=3				n=1		n=2		n=3				Table Analyzed	CXCR2 qPCR delta delta CT value
				dysplasia cells	Contralateral fibroblasts	dysplasia cells	Contralateral fibroblasts	dysplasia cells	Contralateral fibroblasts			dysplasia cells	Contralateral fibroblasts	dysplasia cells	Contralateral fibroblasts	dysplasia cells	Contralateral fibroblasts
											Gapdh	16.158	15.524	16.542	14.638	15.972	15.854			Column B	Fibroblast; Contralateral
			Gapdh	15.874	15.517	15.831	15	15.841	15.637			15.572	15.514	15.122	15.353	15.714	15.424			vs.	vs.
			Cxcr2	20.931	19.339	21.832	19.39	20.019	18.339		Average of technical replicates	15.865	15.519	15.832	14.9955	15.843	15.639			Column A	Dysplastic cells; Contralateral
			Delta Ct	5.057	3.822	6.001	4.39	4.178	2.702											Unpaired t test with Welch's correction
												n=1		n=2		n=3				P value	0.006
			Average	5.057		6.001		4.178				dysplasia cells	Contralateral fibroblasts	dysplasia cells	Contralateral fibroblasts	dysplasia cells	Contralateral fibroblasts			P value summary	**
			Delta Delta Ct	0	-1.235	0	-1.611	0	-1.476		Cxcr2	20.892	18.704	21.748	19.625	19.902	18.552			Significantly different (P < 0.05)?	Yes
												20.974	19.973	21.912	19.153	20.137	18.126			One- or two-tailed P value?	Two-tailed
			Fold Change	1	2.35381	1	3.05463	1	2.78176		Average of technical replicates	20.933	19.3385	21.83	19.389	20.0195	18.339			Welch-corrected t, df	t=13.32, df=2.000
																				How big is the difference?
																				Mean of column A	0
																				Mean of column B	-1.443
																				Difference between means (B - A) ± SEM	-1.443 ± 0.1084
																				95% confidence interval	-1.910 to -0.9770
																				R squared (eta squared)	0.9889
																				F test to compare variances
																				F, DFn, Dfd	Infinity, 2, 2
																				P value	<.001
																				P value summary	***
																				Significantly different (P < 0.05)?	Yes
																				Data analyzed
																				Sample size, column A	3
																				Sample size, column B	3
			Fig.4J Effect of anti-CXCR2 antibody treatment on cell survivial on IRI kidney								24h									48h
				24 h			48 h				Number of families	1								Number of families	1
			concentration of CXCR2 (μg/mL))	n=1	n=2	n=3	n=1	n=2	n=3		Number of comparisons per family	6								Number of comparisons per family	6
			0	100	100	100	100	100	100		Alpha	0.05								Alpha	0.05
			12.5	114.426	103.268	101.243	109.837	112.213	93.731
			25	105.372	124.387	107.415	116.131	134.535	108.093		Tukey's multiple comparisons test	Mean Diff.	95.00% CI of diff.	Significant?	Summary	Adjusted P Value				Tukey's multiple comparisons test	Mean Diff.	95.00% CI of diff.	Significant?	Summary	Adjusted P Value
			50	102.604	94.728	113.842	110.425	109.326	103.576		0 vs. 12.5	-6.313	-27.05 to 14.42	No	ns	0.767	A-B			0 vs. 12.5	-5.257	-27.92 to 17.41	No	ns	0.877	A-B
											0 vs. 25	-12.4	-33.13 to 8.342	No	ns	0.295	A-C			0 vs. 25	-19.52	-42.18 to 3.151	No	ns	0.094	A-C
											0 vs. 50	-3.723	-24.46 to 17.01	No	ns	0.937	A-D			0 vs. 50	-7.773	-30.44 to 14.89	No	ns	0.7	A-D
											12.5 vs. 25	-6.083	-26.82 to 14.65	No	ns	0.786	B-C			12.5 vs. 25	-14.26	-36.93 to 8.408	No	ns	0.259	B-C
											12.5 vs. 50	2.59	-18.15 to 23.33	No	ns	0.977	B-D			12.5 vs. 50	-2.517	-25.18 to 20.15	No	ns	0.983	B-D
											25 vs. 50	8.673	-12.06 to 29.41	No	ns	0.566	C-D			25 vs. 50	11.74	-10.92 to 34.41	No	ns	0.402	C-D
			Fig.4K Effect of anti-CXCR2 antibody treatment on cell survivial on contralatral kidney								24h									48h
				24 h			48 h				Number of families	1								Number of families	1
			concentration of CXCR2 (μg/mL))	n=1	n=2	n=3	n=1	n=2	n=3		Number of comparisons per family	6								Number of comparisons per family	6
			0	100	100	100	100	100	100		Alpha	0.05								Alpha	0.05
			12.5	99.865	98.679	115.992	113.491	104.863	118.546
			25	97.588	112.355	91.074	115.514	97.595	112.363		Tukey's multiple comparisons test	Mean Diff.	95.00% CI of diff.	Significant?	Summary	Adjusted P Value				Tukey's multiple comparisons test	Mean Diff.	95.00% CI of diff.	Significant?	Summary	Adjusted P Value
			50	107.831	97.532	89.906	105.173	107.832	119.681		0 vs. 12.5	-4.841	-27.24 to 17.56	No	ns	0.897	A-B			0 vs. 12.5	-13.01	-31.41 to 5.390	No	ns	0.186	A-B
											0 vs. 25	-0.3113	-22.71 to 22.09	No	ns	>.999	A-C			0 vs. 25	-8.491	-26.89 to 9.911	No	ns	0.492	A-C
											0 vs. 50	1.55	-20.85 to 23.95	No	ns	0.996	A-D			0 vs. 50	-10.52	-28.92 to 7.885	No	ns	0.327	A-D
											12.5 vs. 25	4.529	-17.87 to 26.93	No	ns	0.913	B-C			12.5 vs. 25	4.521	-13.88 to 22.92	No	ns	0.859	B-C
											12.5 vs. 50	6.391	-16.01 to 28.79	No	ns	0.799	B-D			12.5 vs. 50	2.495	-15.91 to 20.90	No	ns	0.971	B-D
											25 vs. 50	1.861	-20.54 to 24.26	No	ns	0.993	C-D			25 vs. 50	-2.026	-20.43 to 16.38	No	ns	0.984	C-D

## Sheet: Figure 5
																								Table Analyzed	LY6G
			Fig.5B Number of ly6G positive cells/visual field (200X)																					Column D	GPPY
			Injuried kidney										Contralateral kidney											vs.	vs.
			WT					GPPY					WT					GPPY						Column B	GPPY
			Mouse #	Image #	% area	Average per mouse		Mouse #	Image #	% area	Average per mouse		Mouse #	Image #	% area	Average per mouse		Mouse #	Image #	% area	Average per mouse
			K16	1	0	0		K18	1	25	22.3333		K16	1	0	0		K18	1	67	67.3333			Unpaired t test
				2	0				2	19				2	0				2	62				P value	0.001
				3	0				3	23				3	0				3	73				P value summary	**
			O304	1	0	0		W021	1	42	34.3333		O304	1	0	0		W021	1	78	76.3333			Significantly different (P < 0.05)?	Yes
				2	0				2	32				2	0				2	82				One- or two-tailed P value?	Two-tailed
				3	0				3	29				3	0				3	69				t, df	t=5.907, df=6
			S660	1	0	0		W022	1	38	33.6667		S660	1	0	0		W022	1	45	56
				2	0				2	39				2	0				2	59				How big is the difference?
				3	0				3	24				3	0				3	62				Mean of column B	32.75
			B992	1	0	0		W026	1	30	40.6667		B992	1	0	0		W026	1	58	65			Mean of column D	66.17
				2	0				2	49				2	0				2	71				Difference between means (D - B) ± SEM	33.42 ± 5.657
				3	0				3	43				3	0				3	66				95% confidence interval	19.58 to 47.26
																								R squared (eta squared)	0.8533
																								F test to compare variances
																								F, DFn, Dfd	1.200, 3, 3
																								P value	0.884
																								P value summary	ns
																								Significantly different (P < 0.05)?	No
																								Data analyzed
			Fig.5D Percent CD3 postive area/visual field (200X)																					Sample size, column B	4
			Injuried kidney										Contralateral kidney											Sample size, column D	4
			WT					GPPY					WT					GPPY
			Mouse #	Image #	% area	Average per mouse		Mouse #	Image #	% area	Average per mouse		Mouse #	Image #	% area	Average per mouse		Mouse #	Image #	% area	Average per mouse
			K16	1	14.292	15.0487		W72	1	8.122	4.01767		K16	1	7.023	11.6137		W72	1	1.126	2.76333
				2	19.893				2	3.686				2	14.235				2	4.543				Number of families	1
				3	10.961				3	0.245				3	13.583				3	2.621				Number of comparisons per family	6
			O304	1	11.802	12.153		K18	1	0.315	1.81133		O304	1	21.132	15.8053		K18	1	0.14	0.629667			Alpha	0.05
				2	9.56				2	3.804				2	12.424				2	1.586
				3	15.097				3	1.315				3	13.86				3	0.163				Tukey's multiple comparisons test	Mean Diff.	95.00% CI of diff.	Significant?	Summary	Adjusted P Value
			S660	1	10.547	10.972		W021	1	2.116	2.03367		S660	1	18.324	16.672		W021	1	0.676	1.531			WT vs. GPPY	9.458	6.515 to 12.40	Yes	***	<.001	A-B
				2	8.901				2	0.831				2	20.902				2	1.013				WT vs. WT	-1.688	-4.630 to 1.255	No	ns	0.385	A-C
				3	13.043				3	3.154				3	10.79				3	2.904				WT vs. GPPY	10.5	7.554 to 13.44	Yes	***	<.001	A-D
			B992	1	12.45	13.6513		W022	1	4.233	3.10067		B992	1	12.307	12.902		W022	1	2.701	1.642			GPPY vs. WT	-11.15	-14.09 to -8.203	Yes	***	<.001	B-C
				2	18.019				2	1.721				2	11.043				2	0.907				GPPY vs. GPPY	1.039	-1.904 to 3.981	No	ns	0.746	B-D
				3	10.485				3	3.348				3	15.356				3	1.318				WT vs. GPPY	12.18	9.241 to 15.13	Yes	***	<.001	C-D
			O328	1	12.907	11.4803		W026	1	1.923	4.91533		O328	1	17.705	14.6077		W026	1	5.302	4.02533
				2	7.145				2	9.009				2	12.102				2	4.163
				3	14.389				3	3.814				3	14.016				3	2.611
			Fig.5F Number of CXCR2 and FSP-1 postive cells/visual field (200X)
			Injuried kidney					Contralateral kidney						Table Analyzed	CXCR2 FSP-1
			Mouse #	Image #	% area	Average per mouse		Mouse #	Image #	% area	Average per mouse
			K16	1	14	17.6667		W72	1	39	19.3333			Column B	Contralateral
				2	20				2	8				vs.	vs.
				3	19				3	11				Column A	IRI
			O304	1	9	7.66667		K18	1	54	39.3333
				2	2				2	40				Unpaired t test
				3	12				3	24				P value	0.015
			S660	1	14	9.66667		W021	1	45	33			P value summary	*
				2	7				2	21				Significantly different (P < 0.05)?	Yes
				3	8				3	33				One- or two-tailed P value?	Two-tailed
			B992	1	19	15		W022	1	26	35.6667			t, df	t=3.103, df=8
				2	11				2	42
				3	15				3	39				How big is the difference?
			O328	1	11	19.6667		W026	1	18	18.3333			Mean of column A	13.93
				2	23				2	11				Mean of column B	29.13
				3	25				3	26				Difference between means (B - A) ± SEM	15.20 ± 4.898
														95% confidence interval	3.905 to 26.49
														R squared (eta squared)	0.5462
														F test to compare variances
														F, DFn, Dfd	3.551, 4, 4
														P value	0.247
														P value summary	ns
														Significantly different (P < 0.05)?	No
														Data analyzed
														Sample size, column A	5
														Sample size, column B	5
			Fig.5H Number CXCR2 and Ly6G postive cells/visual field (200X)											Table Analyzed	CXCR2 Ly6G
			Injuried kidney					Contralateral kidney
			Mouse #	Image #	% area	Average per mouse		Mouse #	Image #	% area	Average per mouse			Column B	Contralateral
			K16	1	17	16.3333		W72	1	23	20			vs.	vs.
				2	20				2	21				Column A	IRI
				3	12				3	16
			O304	1	10	10.3333		K18	1	26	29.3333			Unpaired t test
				2	17				2	34				P value	0.006
				3	4				3	28				P value summary	**
			S660	1	7	8		W021	1	25	32.6667			Significantly different (P < 0.05)?	Yes
				2	12				2	43				One- or two-tailed P value?	Two-tailed
				3	5				3	30				t, df	t=3.744, df=8
			B992	1	13	10.6667		W022	1	12	14.6667
				2	8				2	22				How big is the difference?
				3	11				3	10				Mean of column A	10.87
			O328	1	8	9		W026	1	32	23.6667			Mean of column B	24.07
				2	6				2	22				Difference between means (B - A) ± SEM	13.20 ± 3.526
				3	13				3	17				95% confidence interval	5.069 to 21.33
														R squared (eta squared)	0.6366
														F test to compare variances
														F, DFn, Dfd	4.934, 4, 4
														P value	0.151
														P value summary	ns
														Significantly different (P < 0.05)?	No
														Data analyzed
														Sample size, column A	5
														Sample size, column B	5

## Sheet: Figure 6
			Fig.6B Relative percentage of tumor region in kidney (%)											Fig.6C Relative percentage of dysplasia region in kidney (%)
			Isotype treatment					Anti-CXCR2 treatment						Isotype treatment					Anti-CXCR2 treatment
				Injuried kidney		Contralateral kidney		Injuried kidney		Contralateral kidney					Injuried kidney		Contralateral kidney		Injuried kidney		Contralateral kidney
			Mouse #	WT	GPPY	WT	GPPY	WT	GPPY	WT	GPPY			Mouse #	WT	GPPY	WT	GPPY	WT	GPPY	WT	GPPY
			1	0 (B995)	5.0234 (B998)	0 (B995)	21.3578 (B998)	0 (G274)	0 (G264)	0 (G274)	0 (G264)			1	0 (B995)	15.8315 (B998)	0 (B995)	18.1632 (B998)	0 (G274)	13.9017 (G264)	0 (G274)	11.4092 (G264)
			2	0 (G258)	3.9972 (O374)	0 (G258)	15.6412 (O374)	0 (G266)	0 (G265)	0 (G266)	0 (G265)			2	0 (G258)	9.2817 (O374)	0 (G258)	13.8241 (O374)	0 (G266)	8.9871 (G242)	0 (G266)	10.5101 (G242)
			3	0 (B996)	1.1183 (G260)	0 (B996)	5.1749 (G260)	0 (G237)	0 (B986)	0 (G237)	0 (B986)			3	0 (B996)	5.7001 (G260)	0 (B996)	23.8924 (G260)	0 (G237)	6.9886 (B986)	0 (G237)	8.2021 (B986)
			4	0 (G259)	0 (B997)	0 (G259)	4.2413 (B997)	0 (G241)	0 (G240)	0 (G241)	0 (G240)			4	0 (B997)	11.1619 (B997)	0 (G259)	9.1064 (B997)	0 (G241)	4.2308 (G240)	0 (G241)	4.9676 (G240)
			5	0 (G263)	0 (G262)	0 (G263)	0 (G262)	0 (G233)	0 (G242)	0 (G233)	0 (G242)			5	0 (G262)	5.5122 (G262)	0 (G263)	15.4115 (G262)	0 (G233)	3.1022 (G265)	0 (G233)	7.3733 (G265)
			Tumor region analysis											Dysplasia region analysis
			Number of families	1										Number of families	1
			Number of comparisons per family	28										Number of comparisons per family	28
			Alpha	0.05										Alpha	0.05
			Dunn's multiple comparisons test	Mean rank diff.	Significant?	Summary	Adjusted P Value							Dunn's multiple comparisons test	Mean rank diff.	Significant?	Summary	Adjusted P Value
			WT vs. GPPY	-11	No	ns	0.691	A-B						WT vs. GPPY	-19.7	No	ns	0.123	A-B
			WT vs. WT	0	No	ns	>.999	A-C						WT vs. WT	0	No	ns	>.999	A-C
			WT vs. GPPY	-17	Yes	*	0.014	A-D						WT vs. GPPY	-25.7	Yes	**	0.006	A-D
			WT vs. WT	0	No	ns	>.999	A-E						WT vs. WT	0	No	ns	>.999	A-E
			WT vs. GPPY	0	No	ns	>.999	A-F						WT vs. GPPY	-16.3	No	ns	0.517	A-F
			WT vs. WT	0	No	ns	>.999	A-G						WT vs. WT	0	No	ns	>.999	A-G
			WT vs. GPPY	0	No	ns	>.999	A-H						WT vs. GPPY	-18.3	No	ns	0.228	A-H
			GPPY vs. WT	11	No	ns	0.691	B-C						GPPY vs. WT	19.7	No	ns	0.123	B-C
			GPPY vs. GPPY	-6	No	ns	>.999	B-D						GPPY vs. GPPY	-6	No	ns	>.999	B-D
			GPPY vs. WT	11	No	ns	0.691	B-E						GPPY vs. WT	19.7	No	ns	0.123	B-E
			GPPY vs. GPPY	11	No	ns	0.691	B-F						GPPY vs. GPPY	3.4	No	ns	>.999	B-F
			GPPY vs. WT	11	No	ns	0.691	B-G						GPPY vs. WT	19.7	No	ns	0.123	B-G
			GPPY vs. GPPY	11	No	ns	0.691	B-H						GPPY vs. GPPY	1.4	No	ns	>.999	B-H
			WT vs. GPPY	-17	Yes	*	0.014	C-D						WT vs. GPPY	-25.7	Yes	**	0.006	C-D
			WT vs. WT	0	No	ns	>.999	C-E						WT vs. WT	0	No	ns	>.999	C-E
			WT vs. GPPY	0	No	ns	>.999	C-F						WT vs. GPPY	-16.3	No	ns	0.517	C-F
			WT vs. WT	0	No	ns	>.999	C-G						WT vs. WT	0	No	ns	>.999	C-G
			WT vs. GPPY	0	No	ns	>.999	C-H						WT vs. GPPY	-18.3	No	ns	0.228	C-H
			GPPY vs. WT	17	Yes	*	0.014	D-E						GPPY vs. WT	25.7	Yes	**	0.006	D-E
			GPPY vs. GPPY	17	Yes	*	0.014	D-F						GPPY vs. GPPY	9.4	No	ns	>.999	D-F
			GPPY vs. WT	17	Yes	*	0.014	D-G						GPPY vs. WT	25.7	Yes	**	0.006	D-G
			GPPY vs. GPPY	17	Yes	*	0.014	D-H						GPPY vs. GPPY	7.4	No	ns	>.999	D-H
			WT vs. GPPY	0	No	ns	>.999	E-F						WT vs. GPPY	-16.3	No	ns	0.517	E-F
			WT vs. WT	0	No	ns	>.999	E-G						WT vs. WT	0	No	ns	>.999	E-G
			WT vs. GPPY	0	No	ns	>.999	E-H						WT vs. GPPY	-18.3	No	ns	0.228	E-H
			GPPY vs. WT	0	No	ns	>.999	F-G						GPPY vs. WT	16.3	No	ns	0.517	F-G
			GPPY vs. GPPY	0	No	ns	>.999	F-H						GPPY vs. GPPY	-2	No	ns	>.999	F-H
			WT vs. GPPY	0	No	ns	>.999	G-H						WT vs. GPPY	-18.3	No	ns	0.228	G-H
			Fig.6E Percent FSP-1 postive area/visual field (200X)
			Isotype treatment										Anti-CXCR2 treatment
			GPPY, IRI					GPPY,Contralateral					GPPY, IRI					GPPY,Contralateral
			Mouse #	Image #	% area	Average per mouse		Mouse #	Image #	% area	Average per mouse		Mouse #	Image #	% area	Average per mouse		Mouse #	Image #	% area	Average per mouse			Number of families	1
			B998	1	22.012	24.397		B998	1	38.987	37.2367		G264	1	23.283	16.672		G264	1	20.998	17.0577			Number of comparisons per family	6
				2	25.063				2	41.093				2	8.17				2	11.961				Alpha	0.05
				3	26.116				3	31.63				3	18.563				3	18.214
			O374	1	25.315	23.1123		O374	1	40.083	33.423		G242	1	9.572	15.6073		G242	1	14.802	13.7303			Tukey's multiple comparisons test	Mean Diff.	95.00% CI of diff.	Significant?	Summary	Adjusted P Value
				2	14.236				2	31.731				2	21.331				2	17.697				GPPY vs. GPPY	-9.33	-16.14 to -2.525	Yes	**	0.006
				3	29.786				3	28.455				3	15.919				3	8.692				GPPY vs. GPPY	8.352	1.547 to 15.16	Yes	*	0.014
			G260	1	21.178	20.885		G260	1	22.198	24.733		B986	1	12.683	12.7873		B986	1	17.904	14.061			GPPY vs. GPPY	8.372	1.567 to 15.18	Yes	*	0.014
				2	17.914				2	18.707				2	11.492				2	13.231				GPPY vs. GPPY	17.68	10.88 to 24.49	Yes	***	<.001
				3	23.563				3	33.294				3	14.187				3	11.048				GPPY vs. GPPY	17.7	10.90 to 24.51	Yes	***	<.001
			B997	1	26.214	21.0867		B997	1	22.152	28.7917		G240	1	21.576	13.625		G240	1	7.041	10.5787			GPPY vs. GPPY	0.02004	-6.785 to 6.825	No	ns	>.999
				2	22.005				2	38.184				2	8.919				2	10.974
				3	15.041				3	26.039				3	10.38				3	13.721
			G262	1	20.925	17.1853		G262	1	23.166	29.0985		G265	1	9.875	6.214		G265	1	10.162	9.37833
				2	11.438				2	21.757				2	3.573				2	13.78
				3	19.193				3	42.371				3	5.194				3	4.193
			Fig.6G Number of ly6G positive cells/visual field (200X)
			Isotype treatment										Anti-CXCR2 treatment
			GPPY, IRI					GPPY,Contralateral					GPPY, IRI					GPPY, Contralateral
			Mouse #	Image #	% area	Average per mouse		Mouse #	Image #	% area	Average per mouse		Mouse #	Image #	% area	Average per mouse		Mouse #	Image #	% area	Average per mouse
			B998	1	32	37.3333		B998	1	78	67.6667		G264	1	27	31.3333		G264	1	22	23			Number of families	1
				2	41				2	53				2	42				2	27				Number of comparisons per family	6
				3	39				3	72				3	25				3	20				Alpha	0.05
			O374	1	45	35		O374	1	73	68.6667		G242	1	28	27		G242	1	33	27.6667
				2	33				2	77				2	23				2	22				Tukey's multiple comparisons test	Mean Diff.	95.00% CI of diff.	Significant?	Summary	Adjusted P Value
				3	27				3	56				3	30				3	28				GPPY vs. GPPY	-30.42	-41.85 to -18.98	Yes	***	<.001	A-B
			B997	1	44	44.6667		B997	1	68	77		G240	1	23	19		G240	1	23	18.3333			GPPY vs. GPPY	12.83	1.398 to 24.27	Yes	*	0.027	A-C
				2	40				2	79				2	19				2	15				GPPY vs. GPPY	11.58	0.1480 to 23.02	Yes	*	0.047	A-D
				3	50				3	84				3	15				3	17				GPPY vs. GPPY	43.25	31.81 to 54.69	Yes	***	<.001	B-C
			G262	1	38	34.3333		G262	1	59	63		B986	1	17	22.6667		B986	1	21	33.3333			GPPY vs. GPPY	42	30.56 to 53.44	Yes	***	<.001	B-D
				2	40				2	61				2	36				2	40				GPPY vs. GPPY	-1.25	-12.69 to 10.19	No	ns	0.988	C-D
				3	25				3	69				3	15				3	39
			Fig. 6I Percent CD3 postive area/visual field (200X)
			Isotype treatment										Anti-CXCR2 treatment
			GPPY, IRI					GPPY, Contralateral					GPPY, IRI					GPPY, Contralateral
			Mouse #	Image #	% area	Average per mouse		Mouse #	Image #	% area	Average per mouse		Mouse #	Image #	% area	Average per mouse		Mouse #	Image #	% area	Average per mouse
			B998	1	3.112	3.11367		B998	1	3.901	1.75333		G264	1	8.402	7.264		G264	1	10.109	11.0283			Number of families	1
				2	1.155				2	1.173				2	9.123				2	15.807				Number of comparisons per family	6
				3	5.074				3	0.186				3	4.267				3	7.169				Alpha	0.05
			O374	1	1.753	2.989		O374	1	3.56	2.54467		G242	1	12.503	9.059		G242	1	14.906	10.2645
				2	2.873				2	1.098				2	8.315				2	5.623				Tukey's multiple comparisons test	Mean Diff.	95.00% CI of diff.	Significant?	Summary	Adjusted P Value
				3	4.341				3	2.976				3	6.359				3	9.365				GPPY vs. GPPY	0.8766	-3.112 to 4.865	No	ns	0.921	A-B
			G260	1	6.323	4.08167		G260	1	9.043	4.497		B986	1	11.107	12.2553		B986	1	8.923	10.08			GPPY vs. GPPY	-7.237	-11.23 to -3.248	Yes	***	<.001	A-C
				2	1.236				2	1.807				2	10.512				2	15.753				GPPY vs. GPPY	-8.353	-12.34 to -4.364	Yes	***	<.001	A-D
				3	4.686				3	2.641				3	15.147				3	5.564				GPPY vs. GPPY	-8.114	-12.10 to -4.125	Yes	***	<.001	B-C
			B997	1	2.831	4.57667		B997	1	1.879	4.01133		G240	1	15.251	13.2067		G240	1	11.313	14.8193			GPPY vs. GPPY	-9.229	-13.22 to -5.241	Yes	***	<.001	B-D
				2	7.643				2	3.998				2	10.701				2	15.908				GPPY vs. GPPY	-1.116	-5.104 to 2.873	No	ns	0.853	C-D
				3	3.256				3	6.157				3	13.668				3	17.237
			G262	1	6.465	5.742		G262	1	2.801	3.347		G265	1	21.639	14.8713		G265	1	23.025	16.3747
				2	2.978				2	1.778				2	9.213				2	17.974
				3	7.783				3	5.462				3	13.762				3	8.125

## Sheet: Supplementary Fig.2
		Supplementary Fig. 2C Relative indel percentage
				Vhl sgRNA1	Vhl sgRNA2	Vhl sgRNA3	G+C positive
			Heteroduplex density	8073.71	14699.1	18838.1	38043.3
			Density from (i)	9179.19	13103.9	9638.94	11538.4
			Density density from (ii)	8796.18	8369.09	8016.85	6997.24
			Fraction cleaved (fcut)	0.690058	0.593634	0.483801	0.327607
			(1 – fcut)1/2	0.556725	0.637468	0.71847	0.819996
			Indel% = 100 X (1 – (1 – fcut)1/2)	44.3275	36.2532	28.153	18.0004
		Supplementary Fig.2D Relative Vhl mRNA levels
		n=1		WT	Control sgRNA	Vhl sgRNA1	Vhl sgRNA2	Vhl sgRNA3									Statistical comparisons were performed based on Delta Delta Ct values in each group
										Gapdh							Number of families	1
			Gapdh	14.44	14.66	14.55	14.93	13.97			14.0723	15.1345	14.9475	15.6848	13.1183		Number of comparisons per family	10
			Vhl	19.69	20.34	23.2	21.9	20.38			14.8157	14.1835	14.1572	14.1835	14.8157		Alpha	0.05
										Average of technical replicates	14.444	14.659	14.5524	14.9341	13.967
			Delta Ct	5.25	5.68	8.65	6.97	6.41									Tukey's multiple comparisons test	Mean Diff.	95.00% CI of diff.	Significant?	Summary	Adjusted P Value
										Vhl							WT vs. Vector control	-0.083	-0.8573 to 0.6913	No	ns	0.998	A-B
			Average	5.68							19.1291	19.8632	23.2331	22.5712	20.5383		WT vs. Vhl sgRNA1	-2.537	-3.311 to -1.763	Yes	***	<.001	A-C
			Delta Delta Ct	-0.43	0	2.97	1.29	0.73			20.2573	20.8154	23.1722	21.2352	20.2163		WT vs. Vhl sgRNA2	-1.764	-2.538 to -0.9899	Yes	***	<.001	A-D
										Average of technical replicates	19.6932	20.3393	23.2026	21.9032	20.3773		WT vs. Vhl sgRNA3	-1.095	-1.869 to -0.3203	Yes	**	0.003	A-E
			Fold Change	1.34723	1	0.127627	0.408951	0.602904									Vector control vs. Vhl sgRNA1	-2.454	-3.228 to -1.680	Yes	***	<.001	B-C
																	Vector control vs. Vhl sgRNA2	-1.681	-2.455 to -0.9069	Yes	***	<.001	B-D
		n=2		WT	Control sgRNA	Vhl sgRNA1	Vhl sgRNA2	Vhl sgRNA3		Gapdh							Vector control vs. Vhl sgRNA3	-1.012	-1.786 to -0.2373	Yes	**	0.007	B-E
											14.7961	15.1521	15.1324	14.8233	15.4316		Vhl sgRNA1 vs. Vhl sgRNA2	0.7728	-0.001481 to 1.547	No	ns	0.051	C-D
			Gapdh	15.01	14.99	14.97	14.86	14.78			15.2322	14.8214	14.8124	14.9042	14.1314		Vhl sgRNA1 vs. Vhl sgRNA3	1.442	0.6681 to 2.217	Yes	***	<.001	C-E
			Vhl	20.09	19.78	21.88	21.25	20.71		Average of technical replicates	15.0142	14.9868	14.9724	14.8637	14.7815		Vhl sgRNA2 vs. Vhl sgRNA3	0.6696	-0.1047 to 1.444	No	ns	0.111	D-E
			Delta Ct	5.08	4.79	6.91	6.39	5.93		Vhl
											20.0187	19.5393	21.7542	21.1925	20.3971
			Average	4.79							20.1622	20.0151	22.0118	21.3136	21.0264
			Delta Delta Ct	0.29	0	2.12	1.6	1.14		Average of technical replicates	20.0904	19.7772	21.883	21.2531	20.7117
			Fold Change	0.817902	1	0.230047	0.329877	0.45376
		n=3		WT	Control sgRNA	Vhl sgRNA1	Vhl sgRNA2	Vhl sgRNA3		Gapdh
											12.9076	13.5292	12.4815	12.1834	13.3208
			Gapdh	12.61	12.87	12.7	12.56	12.81			12.3219	12.2134	12.9234	12.9425	12.3015
			Vhl	17.55	17.79	19.14	19.98	18.6		Average of technical replicates	12.6148	12.8713	12.7025	12.563	12.8112
			Delta Ct	4.94	4.92	6.44	7.42	5.79		Vhl
											16.3345	16.6676	20.4718	22.1293	19.0855
			Average	4.92							18.7623	18.9157	17.8014	17.8315	18.1074
			Delta Delta Ct	0.02	0	1.52	2.5	0.87		Average of technical replicates	17.5484	17.7917	19.1366	19.9804	18.5964
			Fold Change	0.986233	1	0.348686	0.176777	0.547147
		n=4		WT	Control sgRNA	Vhl sgRNA1	Vhl sgRNA2	Vhl sgRNA3		Gapdh
											14.9058	14.1806	14.2848	15.0089	13.9377
			Gapdh	14.11	14.23	14.27	14.67	14.13			13.3222	14.2813	14.2632	14.3244	14.3157
			Vhl	19.69	19.8	22.74	21.34	21.02		Average of technical replicates	14.114	14.2309	14.274	14.6667	14.1267
			Delta Ct	5.58	5.57	8.47	6.67	6.89		Vhl
											19.3005	20.4955	21.8492	21.6839	20.5942
			Average	5.57							20.0711	19.1045	23.6311	20.9961	21.4467
			Delta Delta Ct	0.01	0	2.9	1.1	1.32		Average of technical replicates	19.6858	19.8	22.7401	21.34	21.0205
			Fold Change	0.993092	1	0.133972	0.466516	0.400535
		n=5		WT	Control sgRNA	Vhl sgRNA1	Vhl sgRNA2	Vhl sgRNA3		Gapdh
											15.7552	15.3907	16.6163	16.0074	15.2411
			Gapdh	16.21	16.13	16.97	16	15.28			16.6737	16.8735	17.3326	15.9872	15.3217
			Vhl	21.23	21.45	24.97	23.22	21.6		Average of technical replicates	16.2144	16.1321	16.9744	15.9973	15.2814
			Delta Ct	5.02	5.32	8	7.22	6.32		Vhl
											21.3419	21.8845	25.0278	23.6135	21.4566
			Average	5.32							21.1275	21.0193	24.9218	22.8306	21.7418
			Delta Delta Ct	-0.3	0	2.68	1.9	1		Average of technical replicates	21.2347	21.4519	24.9748	23.222	21.5992
			Fold Change	1.23114	1	0.156041	0.267943	0.5
		Supplementary Fig.2F Relative VHL protein levels with normalization
		n=1		WT	Control sgRNA	Vhl sgRNA1	Vhl sgRNA2	Vhl sgRNA3
										Number of comparisons per family	10
			β-actin	71461.2	77503.5	80063.7	85087.1	89404.3		Alpha	0.05
			Vhl	23390.8	19202.5	9409.3	12187.9	10257.1
										Tukey's multiple comparisons test	Mean Diff.	95.00% CI of diff.	Significant?	Summary	Adjusted P Value
			Vhl/β-actin	0.327321	0.247763	0.117523	0.14324	0.114727		WT vs. Vector control	0.066	-0.2784 to 0.4104	No	ns	0.977	A-B
										WT vs. Vhl sgRNA1	0.4771	0.1327 to 0.8216	Yes	**	0.004	A-C
			Fold Change	1.3211	1	0.474334	0.578131	0.46305		WT vs. Vhl sgRNA2	0.5949	0.2505 to 0.9393	Yes	***	<.001	A-D
										WT vs. Vhl sgRNA3	0.672	0.3276 to 1.016	Yes	***	<.001	A-E
		n=2		WT	Control sgRNA	Vhl sgRNA1	Vhl sgRNA2	Vhl sgRNA3		Vector control vs. Vhl sgRNA1	0.4111	0.06671 to 0.7556	Yes	*	0.015	B-C
										Vector control vs. Vhl sgRNA2	0.5289	0.1845 to 0.8733	Yes	**	0.001	B-D
			β-actin	84218	83087.2	99448.6	89626.8	86985.6		Vector control vs. Vhl sgRNA3	0.606	0.2616 to 0.9504	Yes	***	<.001	B-E
			Vhl	62770.3	60706.3	54086.9	24473	22877.8		Vhl sgRNA1 vs. Vhl sgRNA2	0.1178	-0.2267 to 0.4622	No	ns	0.842	C-D
										Vhl sgRNA1 vs. Vhl sgRNA3	0.1949	-0.1496 to 0.5393	No	ns	0.46	C-E
			Vhl/β-actin	0.745331	0.730634	0.543868	0.273054	0.263006		Vhl sgRNA2 vs. Vhl sgRNA3	0.07708	-0.2673 to 0.4215	No	ns	0.961	D-E
			average of control
			Fold Change	1.02012	1	0.744378	0.373723	0.35997
		n=3		WT	Control sgRNA	Vhl sgRNA1	Vhl sgRNA2	Vhl sgRNA3
			β-actin	50859	51481.9	24403.4	26914.6	240071
			Vhl	48495	49392.9	14002	10432.2	7333.26
			Vhl/β-actin	0.953518	0.959422	0.573771	0.387603	0.0305462
			Fold Change	0.993846	1	0.598038	0.403996	0.0318381
		n=4		WT	Control sgRNA	Vhl sgRNA1	Vhl sgRNA2	Vhl sgRNA3
			β-actin	53260.9	35352.6	43658.1	56250.4	61414.7
			Vhl	53835	51447.2	40659.1	41131.2	32621.3
			Vhl/β-actin	1.01078	1.45526	0.931307	0.731216	0.531164
			Fold Change	0.694569	1	0.639959	0.502464	0.364996
		n=5		WT	Control sgRNA	Vhl sgRNA1	Vhl sgRNA2	Vhl sgRNA3
			β-actin	62217.5	78239.6	86796.4	85616.6	94941.1
			Vhl	45376.1	42531.2	23168	23721.1	39112.1
			Vhl/β-actin	0.729315	0.543603	0.266924	0.277062	0.411962
			Fold Change	1.34163	1	0.491028	0.509678	0.757836
		Supplementary Fig.2G Relative VHL protein levels without normalization to β-actin
				WT	Control sgRNA	Vhl sgRNA1	Vhl sgRNA2	Vhl sgRNA3
		n=1	Vhl	23390.8	19202.5	9409.3	12187.9	10257.1
		n=2	Vhl	62770.3	60706.3	54086.9	24473	22877.8
		n=3	Vhl	48495	49392.9	14002	10432.2	7333.26
		n=4	Vhl	53835	51447.2	40659.1	41131.2	32621.3
		n=5	Vhl	45376.1	42531.2	23168	23721.1	39112.1
			Average		44656
				WT	Control sgRNA	Vhl sgRNA1	Vhl sgRNA2	Vhl sgRNA3
		n=1	Vhl	0.523799	0.43001	0.210706	0.272927	0.229691
		n=2	Vhl	1.40564	1.35942	1.21119	0.548033	0.512311
		n=3	Vhl	1.08597	1.10607	0.313552	0.233612	0.164216
		n=4	Vhl	1.20555	1.15208	0.910494	0.921067	0.7305
		n=5	Vhl	1.01613	0.952418	0.518811	0.531197	0.875852

## Sheet: Supplementary Fig.3
		Supplementary Fig. 3D Relative percentage of HIF-1a postive area/visual field (200X)
		Control sgRNA injection kidney										VHL sgRNA injection kidney
		GPPY, sgRNA kidney					GPPY, Contralateral kidney					GPPY, sgRNA kidney					GPPY, Contralateral kidney
		Mouse #	Image #	% area	Average per mouse		Mouse #	Image #	% area	Average per mouse		Mouse #	Image #	% area	Average per mouse		Mouse #	Image #	% area	Average per mouse
		B921	1	0.824	1.31733		B921	1	2.651	2.173		O371	1	23.378	16.838		O371	1	3.642	1.99633			Tukey's multiple comparisons test	Mean Diff.	95.00% CI of diff.	Significant?	Summary	Adjusted P Value
			2	2.255				2	1.857				2	17.857				2	1.527				GPPY vs. GPPY	-0.3467	-6.217 to 5.523	No	ns	0.997	A-B
			3	0.873				3	2.011				3	9.279				3	0.82				GPPY vs. GPPY	-15.56	-21.43 to -9.690	Yes	***	<.001	A-C
		O366	1	2.214	1.02767		O366	1	2.649	1.941		O372	1	20.967	21.6187		O372	1	3.23	2.07067			GPPY vs. GPPY	-0.2767	-6.147 to 5.593	No	ns	0.999	A-D
			2	0.472				2	2.461				2	24.493				2	2.406				GPPY vs. GPPY	-15.21	-21.08 to -9.343	Yes	***	<.001	B-C
			3	0.397				3	0.713				3	19.396				3	0.576				GPPY vs. GPPY	0.07	-5.800 to 5.940	No	ns	>.999	B-D
		O375	1	3.434	2.22733		O375	1	1.086	1.51367		B960	1	16.305	12.7983		B960	1	2.265	1.34433			GPPY vs. GPPY	15.28	9.413 to 21.15	Yes	***	<.001	C-D
			2	1.241				2	1.666				2	13.428				2	0.172
			3	2.007				3	1.789				3	8.662				3	1.596

## Sheet: Supplementary Fig.4
			Supplementary Fig. 4B Percent necrotic positive area per visual field (200X)
			GPPY, IRI					GPPY, Contralateral					Table Analyzed	necrotic area
			Mouse #	Image #	% area	Average per mouse		Mouse #	Image #	% area	Average per mouse
			G275	1	3.908	3.96833		G275	1	0.0112	0.00573333		Column B	Contralateral
				2	5.865				2	0.002			vs.	vs.
				3	2.132				3	0.004			Column A	IRI
			K18	1	4.689	7.492		K18	1	0	0
				2	7.225				2	0			Unpaired t test with Welch's correction
				3	10.562				3	0			P value	0.024
			W026	1	6.278	4.117		W026	1	0	0		P value summary	*
				2	3.736				2	0			Significantly different (P < 0.05)?	Yes
				3	2.337				3	0			One- or two-tailed P value?	Two-tailed
			G226	1	5.257	2.484		G226	1	0	0		Welch-corrected t, df	t=4.265, df=3.000
				2	1.321				2	0
				3	0.874				3	0			How big is the difference?
													Mean of column A	4.516
													Mean of column B	0.0015
													Difference between means (B - A) ± SEM	-4.514 ± 1.059
													95% confidence interval	-7.883 to -1.146
													R squared (eta squared)	0.8584
													F test to compare variances
													F, DFn, Dfd	497965, 3, 3
													P value	<.001
													P value summary	***
													Significantly different (P < 0.05)?	Yes
													Data analyzed
													Sample size, column A	4
													Sample size, column B	4
			Supplementary Fig. 4D Percent Ki67 positive area per visual field (200X)										Table Analyzed	ki67
			GPPY, IRI					GPPY, Contralateral
			Mouse #	Image #	% area	Average per mouse		Mouse #	Image #	% area	Average per mouse		Column B	Contralateral
			G275	1	3.472	6.461		G275	1	28.087	25.0397		vs.	vs.
				2	4.251				2	13.074			Column A	IRI
				3	11.66				3	33.958
			K18	1	5.922	10.7993		K18	1	11.561	23.0823		Unpaired t test
				2	14.913				2	28.412			P value	0.006
				3	11.563				3	29.274			P value summary	**
			W026	1	9.082	9.199		W026	1	32.96	27.9283		Significantly different (P < 0.05)?	Yes
				2	10.364				2	22.452			One- or two-tailed P value?	Two-tailed
				3	8.151				3	28.373			t, df	t=3.732, df=8
			W021	1	5.325	12.5743		W021	1	18.191	18.3183
				2	14.367				2	22.033			How big is the difference?
				3	18.031				3	14.731			Mean of column A	6.908
													Mean of column B	13.53
													Difference between means (B - A) ± SEM	6.621 ± 1.774
													95% confidence interval	2.529 to 10.71
													R squared (eta squared)	0.6351
													F test to compare variances
													F, DFn, Dfd	2.634, 4, 4
													P value	0.371
													P value summary	ns
													Significantly different (P < 0.05)?	No
													Data analyzed
													Sample size, column A	5
													Sample size, column B	5
			Supplementary Fig. 4H Percent CXCL1 positive area per visual field (200X)
			WT					GPPY					Table Analyzed	cxcl1 IHC no AKI
			Mouse #	Image #	% area	Average per mouse		Mouse #	Image #	% area	Average per mouse
			N97	1	0.11	0.444667		Q624	1	1.576	1.03367		Column B	GPPY
				2	0.572				2	0.071			vs.	vs.
				3	0.652				3	1.454			Column A	WT
			N199	1	2.134	1.20133		Q622	1	1.751	0.933333
				2	0.808				2	0.487			Unpaired t test
				3	0.662				3	0.562			P value	0.91
			N195	1	1.006	1.04867		Q627	1	1.465	2.30867		P value summary	ns
				2	0.853				2	2.386			Significantly different (P < 0.05)?	No
				3	1.287				3	3.075			One- or two-tailed P value?	Two-tailed
			L750	1	3.265	1.962		S546	1	0.097	1.62433		t, df	t=0.1169, df=8
				2	0.978				2	1.914
				3	1.643				3	2.862			How big is the difference?
			L763	1	0.965	1.75433		W016	1	0.742	0.749667		Mean of column A	1.284
				2	1.781				2	0.443			Mean of column B	1.33
				3	2.517				3	1.064			Difference between means (B - A) ± SEM	0.04592 ± 0.3927
													95% confidence interval	-0.8596 to 0.9514
													R squared (eta squared)	0.001707
													F test to compare variances
													F, DFn, Dfd	1.116, 4, 4
													P value	0.918
													P value summary	ns
													Significantly different (P < 0.05)?	No
													Data analyzed
													Sample size, column A	5
													Sample size, column B	5

## Sheet: Supplementary Fig.5
																						Table Analyzed	CXCR2 qPCR fibroblast delta delta CT value
																						Column B	Fibroblast; no IRI
																						vs.	vs.
																						Column A	Fibroblast; Contralateral
					Supplementary Fig. 5F Relative Cxcr2 mRNA levels																	Unpaired t test with Welch's correction
						n=1		n=2		n=3				n=1		n=2		n=3				P value	0.004
						GPPY fibroblasts	Contralateral fibroblasts	GPPY fibroblasts	Contralateral fibroblasts	GPPY fibroblasts	Contralateral fibroblasts			GPPY fibroblasts	Contralateral fibroblasts	GPPY fibroblasts	Contralateral fibroblasts	GPPY fibroblasts	Contralateral fibroblasts			P value summary	**
													Gapdh	23.2607	21.8182	22.9636	23.4856	23.2166	22.6914			Significantly different (P < 0.05)?	Yes
					Gapdh	23.4341	21.8012	23.0014	23.4154	23.2247	22.84			23.6074	21.7843	23.0393	23.3452	23.2328	22.9888			One- or two-tailed P value?	Two-tailed
					Cxcr2	27.8335	29.5129	25.6453	28.7152	26.023	28.71		Average of technical replicates	23.4341	21.8012	23.0014	23.4154	23.2247	22.8401			Welch-corrected t, df	t=15.88, df=2.000
					Delta Ct	4.39941	7.71164	2.64384	5.29979	2.79827	5.87											How big is the difference?
														n=1		n=2		n=3				Mean of column A	0
					Average	4.39941		2.64384		2.79827				Contralateral fibroblasts	GPPY fibroblasts	Contralateral fibroblasts	GPPY fibroblasts	Contralateral fibroblasts	GPPY fibroblasts			Mean of column B	3.013
					Delta Delta Ct	0	3.31223	0	2.65595	0	3.07173		Cxcr2	27.8497	29.1696	25.6978	28.7355	26.0817	28.8597			Difference between means (B - A) ± SEM	3.013 ± 0.1898
														27.8173	29.8561	25.5927	28.695	25.9643	28.5588			95% confidence interval	2.197 to 3.830
					Fold Change	1	0.100675	1	0.158665	1	0.118937		Average of technical replicates	27.8335	29.5129	25.6453	28.7152	26.023	28.7093			R squared (eta squared)	0.9921
																						F test to compare variances
																						F, DFn, Dfd	Infinity, 2, 2
																						P value	<.001
																						P value summary	***
																						Significantly different (P < 0.05)?	Yes
																						Data analyzed
																						Sample size, column A	3
																						Sample size, column B	3

[truncated: 2 more sheets: Supplementary Fig.6, Supplementary Fig.7]
